# Supplementary material for: A Systematic Scoping Review of Fully Idiographic Network Analysis in Mental Health
Source: Springer Nature journal article supplement (doi:10.1007/s10608-025-10674-2), 2025-10-25
Supplement: MOESM1 [file 10608_2025_10674_MOESM1_ESM.docx]

**Online Resource 1** for "A Systematic Scoping Review of Fully Idiographic Network Analysis in Mental Health". *Cognitive Therapy and Research*
Giovanbattista Andreoli, Chiara Rafanelli, Stefan G. Hofmann, Giulia Casu
**Correspondence:** Giovanbattista Andreoli; andreolg@staff.uni-marburg.de

**Scoping review search strings by database**

**MEDLINE**

(("network*"[Title/Abstract] AND ("analys*"[Title/Abstract] OR "statistic*"[Title/Abstract] OR "model*"[Title/Abstract] OR "approach*"[Title/Abstract] OR "psycho*"[Title/Abstract] OR "symptom*"[Title/Abstract] OR "method*"[Title/Abstract]) AND ("idiographic"[Title/Abstract] OR "within subject*"[Title/Abstract] OR "single subject*"[Title/Abstract] OR "individual level*"[Title/Abstract] OR "within person"[Title/Abstract] OR "person centered"[Title/Abstract] OR "person centred"[Title/Abstract] OR "person specific"[Title/Abstract] OR "personalized"[Title/Abstract] OR "personalised"[Title/Abstract])) OR ("idiographic"[Title/Abstract] AND ("analys*"[Title/Abstract] OR "statistic*"[Title/Abstract] OR "model*"[Title/Abstract] OR "approach*"[Title/Abstract] OR "psycho*"[Title/Abstract] OR "symptom*"[Title/Abstract] OR "method*"[Title/Abstract]))) AND (("clinical trial"[Publication Type] OR "controlled clinical trial"[Publication Type] OR "journal article"[Publication Type] OR "meta analysis"[Publication Type] OR "observational study"[Publication Type] OR "randomized controlled trial"[Publication Type] OR "review"[Publication Type] OR "systematic review"[Filter]) AND ("english"[Language] OR "italian"[Language] OR "spanish"[Language] OR "humans"[MeSH Terms]) AND 2010/01/01:2025/01/31[Date - Publication]) AND "medline"[Filter]

**PsycINFO**

( TI (network*) AND TI ( analys* OR statistic* OR model* OR approach* OR psycho* OR symptom* OR method* ) AND TI ( idiographic OR within-subject* OR single-subject* OR individual-level* OR within-person OR person-centered OR person-centred OR person-specific OR personalized OR personalised )) OR ( TI (idiographic) AND TI ( analys* OR statistic* OR model* OR approach* OR psycho* OR symptom* OR method* ) ) OR ( AB (network*) AND AB ( analys* OR statistic* OR model* OR approach* OR psycho* OR symptom* OR method* ) AND AB ( idiographic OR within-subject* OR single-subject* OR individual-level* OR within-person OR person-centered OR person-centred OR person-specific OR personalized OR personalised )) OR ( AB (idiographic) AND AB ( analys* OR statistic* OR model* OR approach* OR psycho* OR symptom* OR method* ) ) OR ( KW (network*) AND KW ( analys* OR statistic* OR model* OR approach* OR psycho* OR symptom* OR method* ) AND KW ( idiographic OR within-subject* OR single-subject* OR individual-level* OR within-person OR person-centered OR person-centred OR person-specific OR personalized OR personalised )) OR ( KW (idiographic) AND KW ( analys* OR statistic* OR model* OR approach* OR psycho* OR symptom* OR method* ) )

**Scopus**

( TITLE-ABS-KEY ( network* ) AND ( analys* OR statistic* OR model* OR approach* OR psycho* OR symptom* OR method* ) AND ( idiographic OR within subject* OR single subject* OR individual level* OR within person OR person centered OR person centred OR person specific OR personalized OR personalised ) ) OR ( TITLE-ABS-KEY ( idiographic ) AND ( analys* OR statistic* OR model* OR approach* OR psycho* OR symptom* OR method* ) ) AND ( LIMIT-TO ( PUBYEAR , 2025 ) OR LIMIT-TO ( PUBYEAR , 2024 ) OR LIMIT-TO ( PUBYEAR , 2023 ) OR LIMIT-TO ( PUBYEAR , 2022 ) OR LIMIT-TO ( PUBYEAR , 2021 ) OR LIMIT-TO ( PUBYEAR , 2020 ) OR LIMIT-TO ( PUBYEAR , 2019 ) OR LIMIT-TO ( PUBYEAR , 2018 ) OR LIMIT-TO ( PUBYEAR , 2017 ) OR LIMIT-TO ( PUBYEAR , 2016 ) OR LIMIT-TO ( PUBYEAR , 2015 ) OR LIMIT-TO ( PUBYEAR , 2014 ) OR LIMIT-TO ( PUBYEAR , 2013 ) OR LIMIT-TO ( PUBYEAR , 2012 ) OR LIMIT-TO ( PUBYEAR , 2011 ) OR LIMIT-TO ( PUBYEAR , 2010 ) ) AND ( LIMIT-TO ( LANGUAGE , "English" ) OR LIMIT-TO ( LANGUAGE , "Italian" ) OR LIMIT-TO ( LANGUAGE , “Spanish” ) ) AND ( LIMIT-TO ( SRCTYPE , "j" ) ) AND ( LIMIT-TO ( DOCTYPE , "ar" ) OR LIMIT-TO ( DOCTYPE , "re" ) )

**Web of Science**

(((TI= (network*)) AND (TI=(analys* OR statistic* OR model* OR approach* OR psycho* OR symptom* OR method*)) AND (TI=( idiographic OR within-subject* OR single-subject* OR individual-level* OR within-person OR person-centered OR person-centred OR person-specific OR personalized OR personalised))) OR ((TI=(idiographic)) AND (TI=(analys* OR statistic* OR model* OR approach* OR psycho* OR symptom* OR method*))) OR ((AB= (network*)) AND (AB=(analys* OR statistic* OR model* OR approach* OR psycho* OR symptom* OR method*)) AND (AB=( idiographic OR within-subject* OR single-subject* OR individual-level* OR within-person OR person-centered OR person-centred OR person-specific OR personalized OR personalised))) OR ((AB=(idiographic)) AND (AB=(analys* OR statistic* OR model* OR approach* OR psycho* OR symptom* OR method*))) OR ((KP= (network*)) AND (KP=(analys* OR statistic* OR model* OR approach* OR psycho* OR symptom* OR method*)) AND (KP=( idiographic OR within-subject* OR single-subject* OR individual-level* OR within-person OR person-centered OR person-centred OR person-specific OR personalized OR personalised))) OR ((KP=(idiographic)) AND (KP=(analys* OR statistic* OR model* OR approach* OR psycho* OR symptom* OR method*))))
