# Supplementary material for: A Systematic Scoping Review of Fully Idiographic Network Analysis in Mental Health
Source: Springer Nature journal article supplement (doi:10.1007/s10608-025-10674-2), 2025-10-25
Supplement: MOESM2 [file 10608_2025_10674_MOESM2_ESM.docx]

**Online Resource 2** for "A Systematic Scoping Review of Fully Idiographic Network Analysis in Mental Health". *Cognitive Therapy and Research*
Giovanbattista Andreoli, Chiara Rafanelli, Stefan G. Hofmann, Giulia Casu
**Correspondence:** Giovanbattista Andreoli; andreolg@staff.uni-marburg.de

**Tables**

**Table S1** Overview of participants’ characteristics in the selected studies

| **Variable** | ***M*** | ***SD*** | **Median** | **Min** | **Max** |
| --- | --- | --- | --- | --- | --- |
| Total number of participants | 118.7 | 262.7 | 34 | 1 | 1,272 |
| **Participants analyzed with FINA** | | | | | |
| N of participants | 42.1 | 59.2 | 18 | 1 | 255 |
| Age (n = 33 studies) | 38.5 | 12.5 | 35.7 | 12 | 69.8 |
| Females (%) (n = 35 studies) | 65.4 | 29.7 | 65 | 0 | 100 |
| Diagnosis (%) (n = 41 studies) |  |  |  |  |  |
| Depression | 41 | 46.7 | 10 | 0 | 100 |
| Comorbidity | 18.2 | 35 | 0 | 0 | 100 |
| Eating disorder | 12.2 | 33.1 | 0 | 0 | 100 |
| Obsessive-compulsive disorder | 2.4 | 15.6 | 0 | 0 | 100 |
| Personality disorder | 2.4 | 15.6 | 0 | 0 | 100 |
| Post-traumatic stress disorder | 7.1 | 26.1 | 0 | 0 | 100 |
| Schizophrenia | 2.4 | 15.6 | 0 | 0 | 100 |
| Tobacco withdrawal | 2.4 | 15.6 | 0 | 0 | 100 |
| Anxiety | 2.5 | 8.7 | 0 | 0 | 51.1 |
| Bipolar disorder | 7.8 | 26.4 | 0 | 0 | 100 |
| Adjustment disorder | 0.2 | 1.3 | 0 | 0 | 8.3 |
| Somatic symptom disorder | 2.4 | 15.6 | 0 | 0 | 100 |
| Not reported | 0.2 | 1.3 | 0 | 0 | 8.3 |
| **Participants analyzed with FINA whose FINA results are reported** | | | | | |
| N of participants | 15 | 27.7 | 3 | 1 | 133 |
| Age (n = 31 studies) | 37.3 | 11.6 | 34.6 | 12 | 60.4 |
| Females (%) (n = 31 studies) | 69.9 | 33.7 | 76.9 | 0 | 100 |
| Diagnosis (%) (n = 39 studies) |  |  |  |  |  |
| Depression | 42.1 | 48.3 | 0 | 0 | 100 |
| Comorbidity | 18.5 | 36.2 | 0 | 0 | 100 |
| Eating disorder | 12.8 | 33.9 | 0 | 0 | 100 |
| Obsessive-compulsive disorder | 2.6 | 16 | 0 | 0 | 100 |
| Personality disorder | 2.6 | 16 | 0 | 0 | 100 |
| Post-traumatic stress disorder | 7.7 | 27 | 0 | 0 | 100 |
| Schizophrenia | 2.6 | 16 | 0 | 0 | 100 |
| Tobacco withdrawal | 2.6 | 16 | 0 | 0 | 100 |
| Anxiety | 0.5 | 2.4 | 0 | 0 | 12.5 |
| Bipolar disorder | 7.7 | 27 | 0 | 0 | 100 |
| Adjustment disorder | 0.2 | 1.3 | 0 | 0 | 8.3 |
| Somatic symptom disorder | 2.6 | 16 | 0 | 0 | 100 |
| Not reported | 0.2 | 1.3 | 0 | 0 | 8.3 |

All values reported summaries data across studies

**Table S2** Overview of data collection methods in the selected studies

|  | | **Device** | | | | **Timescale** | | | | **Max N timepoints**  **(n = 42)** | | | **Sampling scheme (n = 29)** | | | **Max N items/questions at each timepoint  (n = 42)** | | |  | **Type of items/questions** | | | |
| --- | --- | --- | --- | --- | --- | --- | --- | --- | --- | --- | --- | --- | --- | --- | --- | --- | --- | --- | --- | --- | --- | --- | --- |
| **Method** | **N studies (%)** | **Electronic** | **Paper-pencil** | **Face to face/phone** | **NR** | **Daily** | **Multiple daily** | **Weekly** | **Monthly** | ***M* (*SD*)** | **Median** | **Range** | **Fixed** | **Pseudo-random** | **NR** | ***M* (*SD*)** | **Median** | **Range** | **O** | **C** | **OC** | **D** | **NR** |
| EMA | 19 (44.2) | 94.7 | - | - | 5.3 | 5.3 | 94.7 | 0 | 0 | 155.1 (156) | 110 | 28-579 | 52.6 | 21.1 | 26.3 | 20 (16) | 13 | 5-56 | 26.3 | 68.4 | 0 | 0 | 0 |
| ESM | 9 (20.1) | 100 | - | - | 0 | 0 | 100 | 0 | 0 | 285.3 (236.1) | 175 | 60-840 | 22.2 | 66.7 | 11.1 | 13.7 (5.8) | 14 | 4-21 | 66.7 | 33.3 | 0 | 0 | 0 |
| Interview | 2 (4.7) | - | - | 50 | 50 | 0 | 0 | 50 | 50 | 96.5 (68.6) | 96.5 | 48-145 | - | - | - | 8 (0) | 8 | 8 | 0 | 0 | 50 | 50 | 0 |
| Traditional self-report questionnaire | 5 (11.6) | 0 | 60 | 0 | 40 | 60 | 0 | 20 | 20 | 63 (46.6) | 52 | 13-122 | - | - | - | 26.8 (3.8) | 27 | 22-31 | 40 | 0 | 20 | 0 | 20 |
| Interview and traditional self-report questionnaire | 1 (2.3) | 0 | 0 | 0 | 100 | 0 | 0 | 0 | 100 | 6 | - | - | - | - | - | 27 | - | - | 100 | 0 | 0 | 0 | 0 |
| ROM | 3 (7) | 33.3 | 0 | 0 | 66.7 | 0 | 0 | 100 | 0 | 18.3 (13.3) | 15 | 7-33 | - | - | - | 28 (10.9) | 26 | 17-43 | 100 | 0 | 0 | 0 | 0 |
| Diary | 3 (7) | 66.7 | 0 | 0 | 33.3 | 100 | 0 | 0 | 0 | 552.3 (846.6) | 100 | 28-1529 | - | - | - | 10.3 (6) | 11 | 4-16 | 66.7 | 33.3 | 0 | 0 | 0 |
| NR | 1 (2.3) | 100 | 0 | 0 | 0 | 100 | 0 | 0 | 0 | 210 | - | - | 100 | 0 | 0 | 6 | - | - | 0 | 100 | 0 | 0 | 0 |
| Total | 43 (100) | 72.1 | 7 | 2.32 | 18.6 | 18.6 | 62.8 | 11.6 | 7 | 173.3 (180.5) | 98.6 | 7-1529 | 44.8 | 34.5 | 20.7 | 17.5 (9.7) | 14 | 4-56 | 44.2 | 41.9 | 4.7 | 2.3 | 2.3 |

Unless otherwise specified, percentages are reported. M = mean; SD = Standard Deviation; O = Ordinal; C = Continuous; OC = Both ordinal and continuous; N = Nominal; D = Dichotomous; EMA = Ecological Momentary Assessment; ESM = Experience Sampling Methods; ROM = Routine Outcome Monitoring; NR = not reported.

**Table S3** Overview of data analytic methods in the selected studies

|  | | **Data preparation** | | | | | | | | **Network estimation** | | | | | | | | | | | | | **Software for FINA estimation (%)** |
| --- | --- | --- | --- | --- | --- | --- | --- | --- | --- | --- | --- | --- | --- | --- | --- | --- | --- | --- | --- | --- | --- | --- | --- |
| **Model used for FINA** | **N models**  **(%)** | **Report check for type of missing data** | **Report method of missing data handling** | **Report check for normality** | **Report method to correct for non-normality** | **Report check for stationarity** | **Report method to correct for non-stationarity** | **Report treatment of overnight lag**  **(n = 28)** | **Report check for node overlap**  **(n = 37)** | **Variable used for node representation** | | | **Max N of nodes** | | | **Type of network** | | | **Estimation of centrality indices** | | **Report assessment of network stability** | |
| **II** | **CS** | **II**  **CS** | ***M* (*SD*)** | **Median** | **Range** | **CN** | **TN** | **CN TN** | **CN  (n = 36)** | **TN  (n = 33)** | **CN  (n = 36)** | **TN  (n = 33)** |
| GVAR | 15 (34.9) | 6.7 | 73.3 | 13.3 | 0 | 60 | 46.7 | 75 | 21.4 | 60 | 0 | 40 | 9 (3.5) | 8 | 4-15 | 100 | 100 | 0 | 60 | 33.3 | 6.7 | 6.7 | R (100) |
| BayesianVAR | 3 (7) | 0 | 100 | 33.3 | 33.3 | 66.7 | 66.7 | 100 | 33.3 | 100 | 0 | 0 | 7 (2.6) | 6 | 5-10 | 100 | 66.7 | 0 | 66.7 | 50 | 0 | 0 | R (100) |
| tv-VAR | 3 (7) | 0 | 66.7 | 66.7 | 33.3 | NA | - | 66.7 | 33.3 | 100 | 0 | 0 | 9.7 (4.7) | 8 | 6-15 | 33.3 | 100 | 0 | 100 | 66.7 | 0 | 66.7 | R (66.7), NR (33.3) |
| PC-VAR | 1 (2.3) | - | - | 0 | 0 | 0 | 0 | - | 100 | 0 | 0 | 100 | 23 | - | - | 0 | 0 | 100 | 0 | 100 | 0 | 0 | R (100) |
| sVAR | 1 (2.3) | 0 | 100 | 100 | 100 | 0 | 100 | 100 | 0 | 100 | 0 | 0 | 14 | - | - | 0 | 100 | 0 | - | 100 | - | 0 | R (100) |
| mVAR | 1 (2.3) | 0 | 100 | 0 | 0 | 0 | 100 | 100 | 0 | 100 | 0 | 0 | 6 | - | - | 100 | 0 | 0 | 100 | - | 0 | - | R (100) |
| ts-lvGVAR | 1 (2.3) | 0 | 100 | 0 | 0 | 100 | 100 | 100 | NA | 0 | 100 | 0 | 5 | - | - | 100 | 100 | 0 | 100 | 100 | 100 | 100 | R (100) |
| uSEM | 3 (7) | 0 | 33.3 | 33.3 | 33.3 | 0 | 33.3 | 100 | NA | 0 | 66.7 | 33.3 | 4.7 (1.2) | 4 | 4-6 | 0 | 0 | 100 | 0 | 0 | 0 | 0 | LISREL (33.3),  R (66.7) |
| RDSEM | 1 (2.3) | 0 | 100 | 0 | 0 | 0 | 100 | 100 | NA | 0 | 100 | 0 | 6 | - | - | 0 | 0 | 100 | 0 | 0 | 0 | 0 | Mplus (100) |
| RCTSEM | 1 (2.3) | 0 | 100 | 0 | 0 | - | - | NA | 0 | 100 | 0 | 0 | 4 | - | - | 0 | 100 | 0 | - | 100 | - | 0 | R (100) |
| DTW | 7 (16.3) | 0 | 42.9 | NA | - | NA | - | 50 | 0 | 100 | 0 | 0 | 23.3 (10.6) | 24 | 9-43 | 100 | 14.3 | 0 | 42.9 | 100 | 0 | 0 | R (100) |
| DFA | 2 (4.7) | 0 | 50 | 0 | 0 | 50 | 100 | 100 | 0 | 50 | 0 | 50 | 20.5 (0.7) | 20.5 | 20-21 | 100 | 100 | 0 | 100 | 100 | 0 | 0 | LISREL and R (100) |
| DTSMLR | 2 (4.7) | 0 | 0 | 0 | 0 | 50 | 50 | 0 | 0 | 100 | 0 | 0 | 10.2 (3.5) | 16.5 | 14-19 | 0 | 100 | 0 | - | 100 | - | 0 | R (100) |
| ConNEcT | 1 (2.3) | - | - | NA | - | NA | - | - | 0 | 100 | 0 | 0 | 8 | - | - | 100 | 0 | 0 | 0 | - | 0 | - | R (100) |
| L-PECAN | 1 (2.3) | 0 | 0 | NA | - | 100 | 0 | - | 0 | 100 | 0 | 0 | 26 | - | - | 0 | 100 | 0 | - | 0 | - | 100 | R (100) |
| tv-MGM | 1 (2.3) | 0 | 100 | 100 | 100 | NA | - | 100 | 100 | 100 | 0 | 0 | 15 | - | - | 100 | 100 | 0 | 100 | 100 | 0 | 0 | R (100) |
| Total | 44 (100)a | 2.4 | 65.9 | 23.5 | 11.8 | 50 | 56.7 | 82.1 | 18.9 | 72.1 | 7 | 20.9 | 12 (7.4) | 9.4 | 4-43 | 74.4 | 69.8 | 11.6 | 61.1 | 54.5 | 5.6 | 15.2 | R (93), LISREL (7), Mplus (2.3), NR (2.3) |

Unless otherwise specified, percentages are reported. NA = not applicable; VAR = vector auto-regression; GVAR= graphical VAR; tv-VAR = time-varying VAR; PC-VAR = principal component-VAR; sVAR = sparse VAR; mVAR = mixed VAR; ts-lvGVAR = time series latent variables GVAR; uSEM = unified structural equation modeling; RDSEM = residual dynamic structural equation modeling; RCTSEM = regularized continuous time structural equation modeling; DTW = dynamic time warp analysis; DFA = dynamic factor analysis; DTSMLR = dynamic time series multiple linear regression; ConNEcT = contingency measure-based network; L-PECAN = longitudinal perceived causal problem networks; tv-MGM = time-varying mixed graphical model; NR = not reported; II = Individual items; CS = Composite scores; IICS = both individual items and composite scores; CN = contemporaneous network; TN = temporal network; CNTN = both contemporaneous and temporal networks combined in a same plot.

aThe final count of 44 models, despite including only 43 studies, is due to the fact that Scholten et al. (2024) applied two different models in the same study: tv-VAR and tv-MGM.
